# Supplementary material for: Expression Analysis of Phenylpropanoid Pathway Genes and Metabolomic Analysis of Phenylpropanoid Compounds in Adventitious, Hairy, and Seedling Roots of Tartary Buckwheat
Source: MDPI journal article supplement (doi:10.3390/plants11010090), 2021-12-28
Supplement: s1 [file s1]

**Figure S1**

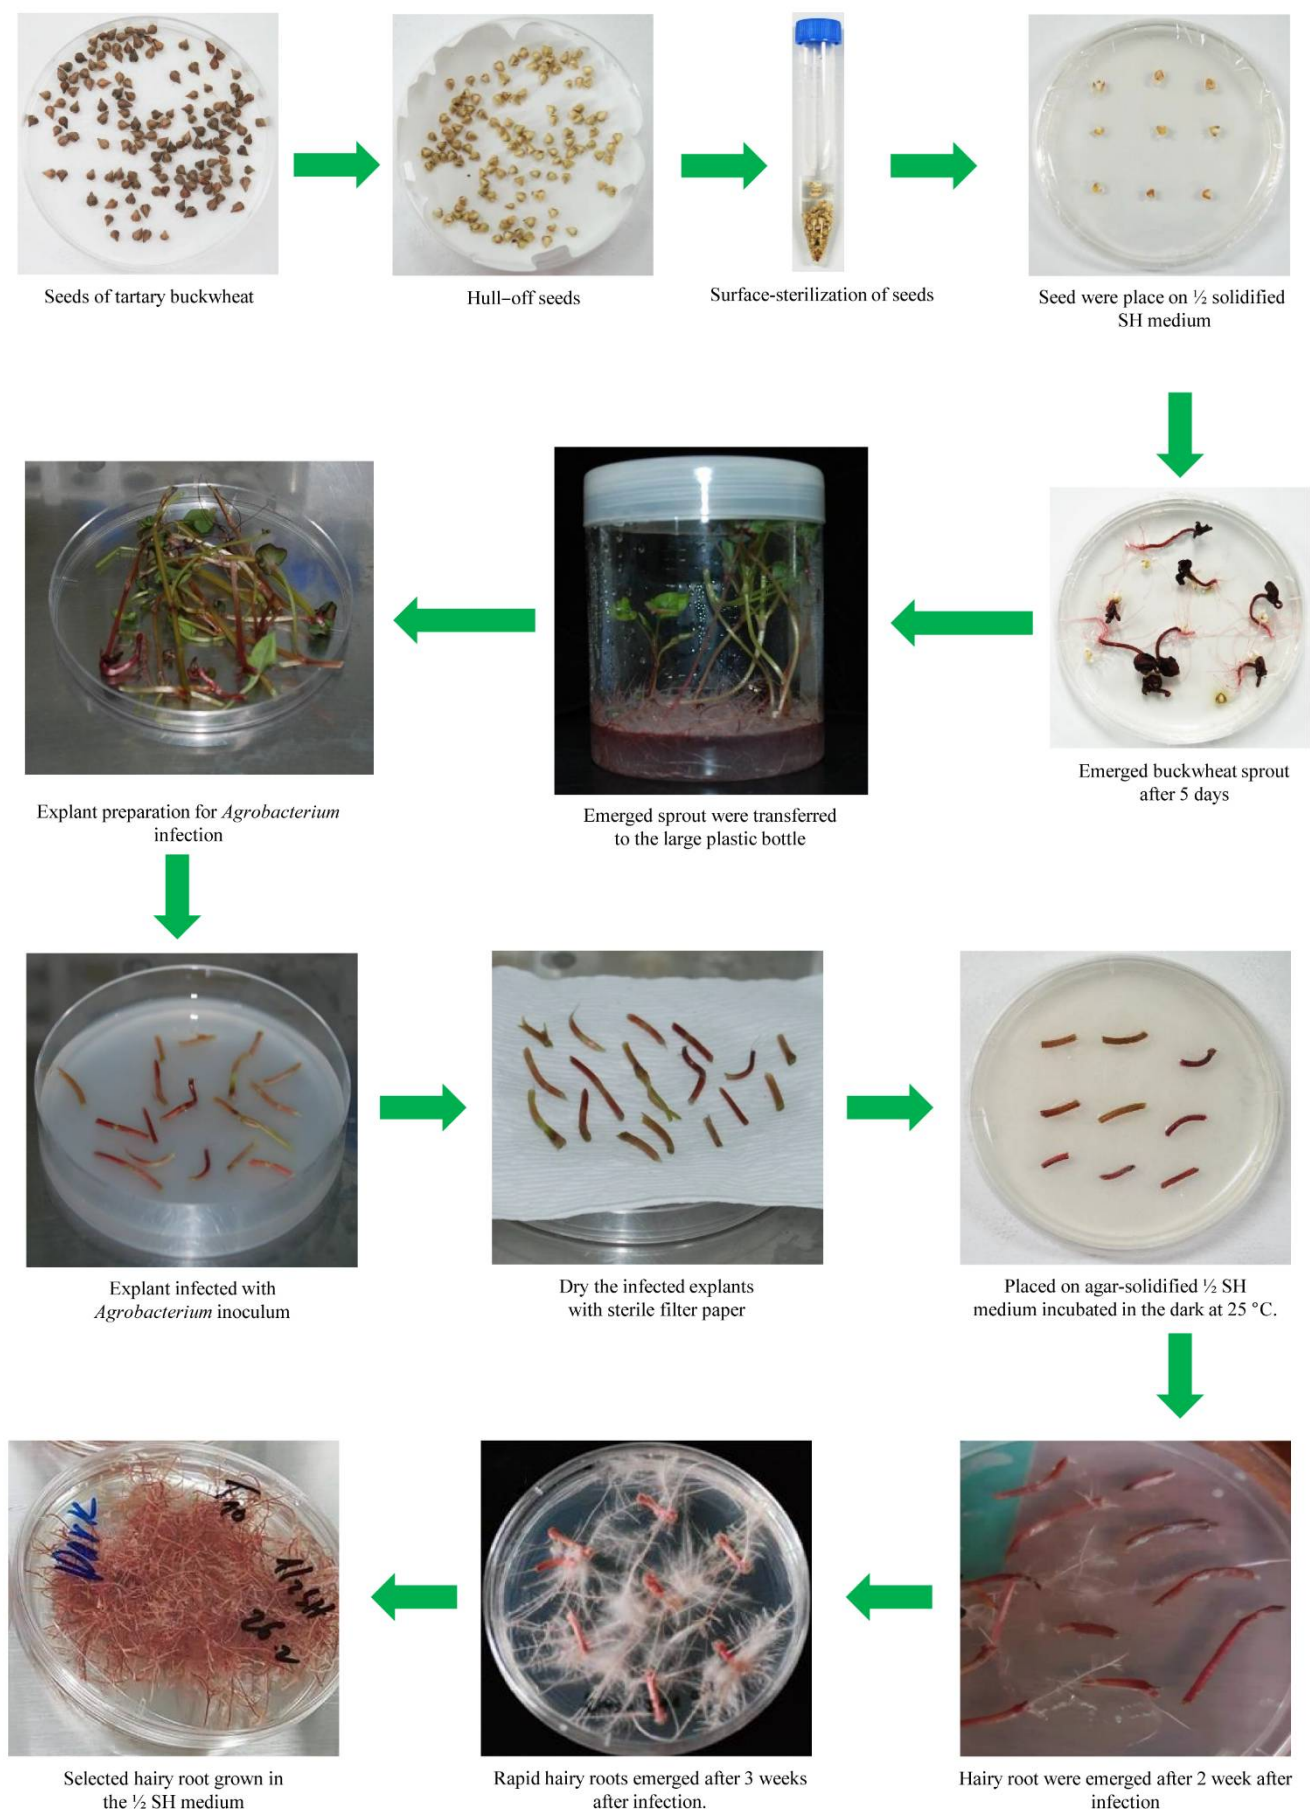

**Figure S1.** Consecutive stages of hairy root (HR) induction in *Fagopyrum tataricum* 'Hokkai T10'..

**Figure S2**

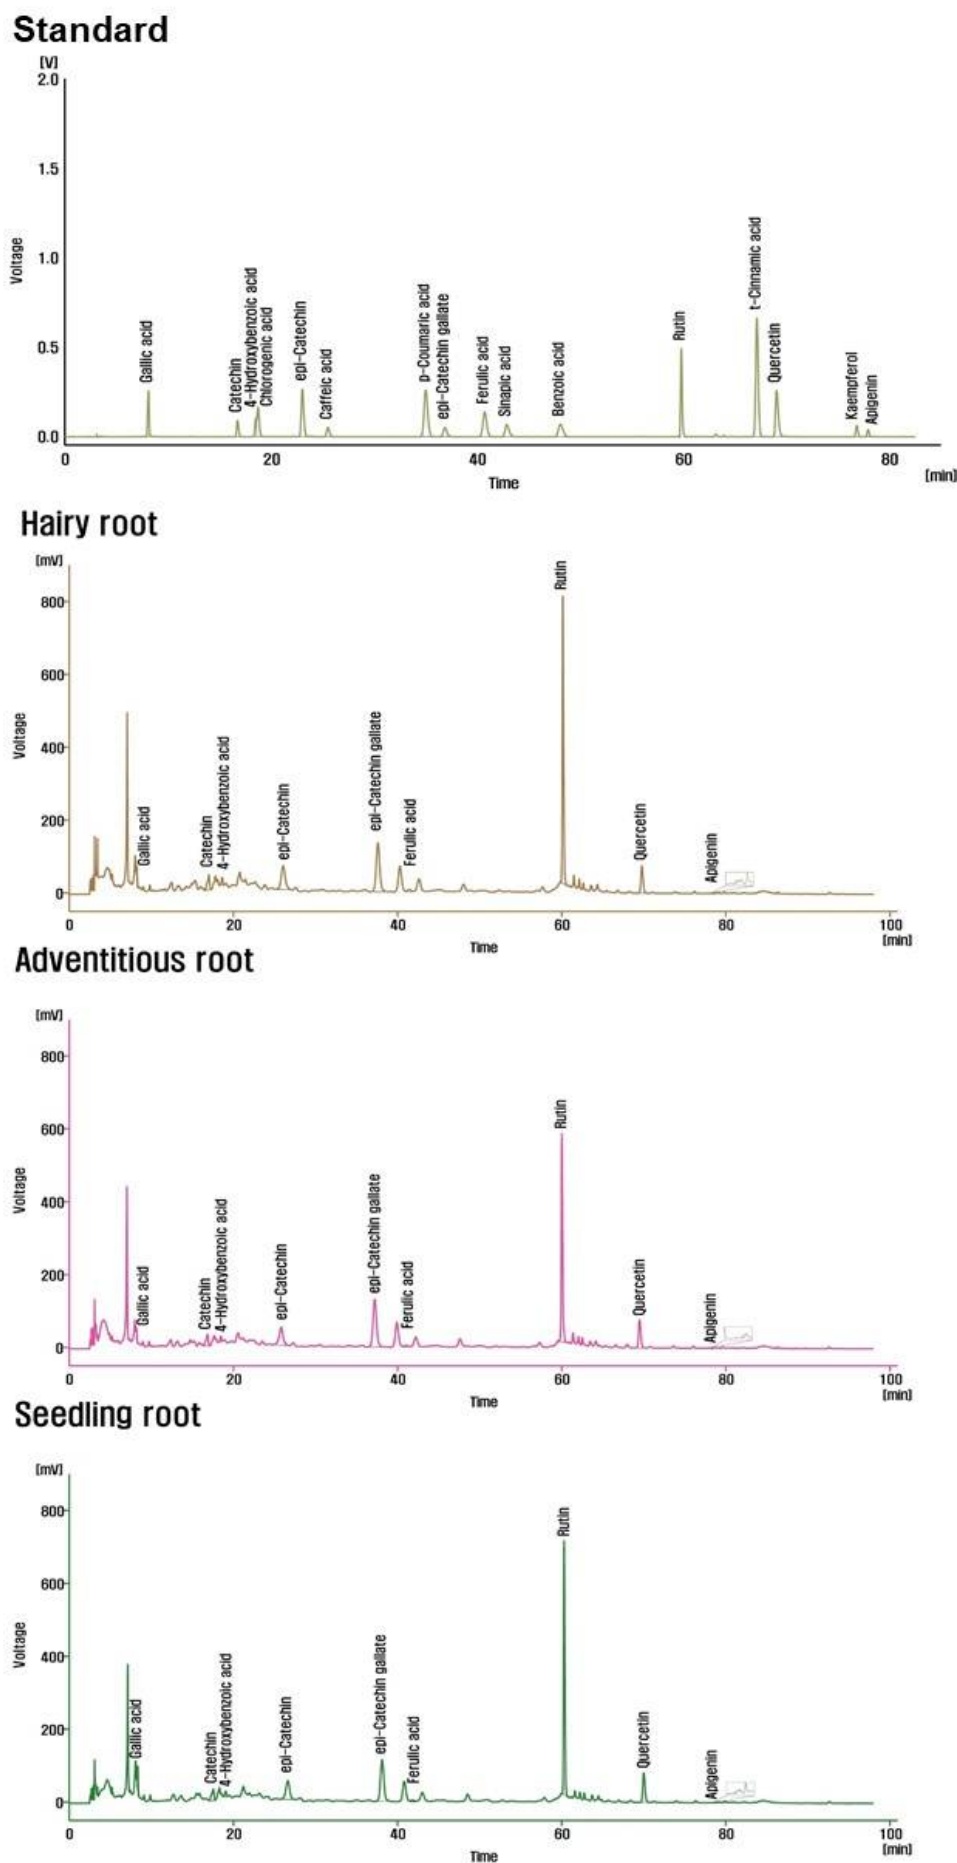

**Figure S2.** HPLC chromatogram of standards, hairy root (HR), adventitious root, and seedling root of *Fagopyrum tataricum* 'Hokkai T10'..
